# Supplementary material for: Development of Antioxidant and Antihypertensive Properties during Growth of Lactobacillus helveticus, Lactobacillus rhamnosus and Lactobacillus reuteri on Cow’s Milk: Fermentation and Peptidomics Study
Source: Foods. 2020 Dec 23;10(1):17. doi: 10.3390/foods10010017 (PMC7822465; doi:10.3390/foods10010017)
Supplement: Supplementary file 1 [file foods-10-00017-s001.xlsx]

## Sheet: Sheet 1
Peptide	Mass	ppm	m_z	UniProt_id	Start_position	End_position	Length	Intensity_Control	Intensity_L.helveticus	Intensity_L.rhamnosus	Intensity_L.reuteri
A.RELEELNVPGEIVES(+79.97)L.S	1904.91	1.2	953.465	P02666|CASB_BOVIN	16	31	16	530000	0	0	261000
A.RELEELNVPGEIVES(+79.97)LS(+79.97)S(+79.97)S(+79.97)EESITRINK.K	3476.48	0.8	1159.84	P02666|CASB_BOVIN	16	43	28	673000	0	0	7290000
A.RELEELNVPGEIVES(+79.97)LS(+79.97)S(+79.97)SEESITRINK.K	3396.51	1.5	1133.18	P02666|CASB_BOVIN	16	43	28	0	0	0	1400000
A.RELEELNVPG.E	1154.59	0.5	578.304	P02666|CASB_BOVIN	16	25	10	760000	0	0	0
A.RELEELN.V	901.451	0.6	451.733	P02666|CASB_BOVIN	16	22	7	536000	0	0	515000
A.RELEELNVPGEIVES(+79.97)LS(+79.97)SS(+79.97)EESITRINK.K	3396.51	4.2	1133.18	P02666|CASB_BOVIN	16	43	28	957000	0	0	0
A.RELEELNVPGEIVESLS(+79.97)S(+79.97)S(+79.97)EESITRINK.K	3396.51	3.1	1133.18	P02666|CASB_BOVIN	16	43	28	0	0	0	1420000
A.RELEELNVPGE.I	1283.64	1.5	642.826	P02666|CASB_BOVIN	16	26	11	0	0	0	1000000
A.RELEELNVPGEIVES(+79.97)LS(+79.97)S(+79.97)S(+79.97)EESITRINKKIEKFQSEEQQQT(+79.97)EDELQDKIHPF.A	6511.87	0.6	1303.38	P02666|CASB_BOVIN	16	67	52	0	0	0	4540000
E.SITRINKKIE.K	1200.72	1.6	601.368	P02666|CASB_BOVIN	37	46	10	0	134000	0	0
E.SITRINKKIEKFQS(+79.97)EE.Q	2029.02	2.4	677.35	P02666|CASB_BOVIN	37	52	16	0	610000	0	0
E.SITRINK.K	830.497	-0.1	416.256	P02666|CASB_BOVIN	37	43	7	0	53400	0	0
T.RINKKIEKF.Q	1174.72	1.7	588.368	P02666|CASB_BOVIN	40	48	9	0	1620000	0	0
T.RINKKIEKFQ.S	1302.78	-0.8	435.266	P02666|CASB_BOVIN	40	49	10	0	260000	0	0
T.RINKKIE.K	899.555	0.3	450.785	P02666|CASB_BOVIN	40	46	7	0	27300	0	0
N.KKIEKFQS(+79.97)EEQQQTEDELQDKIHPF.A	3181.5	5.1	1061.51	P02666|CASB_BOVIN	43	67	25	0	0	0	766000
K.KIEKFQS(+79.97)EEQQQTEDELQDK.I	2559.14	1.9	854.055	P02666|CASB_BOVIN	44	63	20	2250000	0	0	1930000
K.KIEKFQS(+79.97)EEQQ.Q	1472.65	-0.8	737.334	P02666|CASB_BOVIN	44	54	11	40500	0	0	0
K.KIEKFQS(+79.97)EEQQQTED.E	1945.83	2.8	973.925	P02666|CASB_BOVIN	44	58	15	91800	0	0	0
K.KIEKFQSEEQQQTEDELQDK.I	2479.17	-0.5	827.397	P02666|CASB_BOVIN	44	63	20	206000	0	0	193000
K.KIEKFQSEEQQQTEDELQDKIHPF.A	2973.44	4.2	992.157	P02666|CASB_BOVIN	44	67	24	988000	0	0	0
K.KIEKFQS(+79.97)EEQQQTEDELQDKIHPF.A	3053.4	2.1	1018.81	P02666|CASB_BOVIN	44	67	24	1300000	0	0	3260000
K.KIEKFQSEEQQQT(+79.97)EDELQDKIHPF.A	3053.4	5.1	1018.81	P02666|CASB_BOVIN	44	67	24	3120000	0	0	728000
K.IEKFQS(+79.97)EEQQQTEDELQDK.I	2431.04	-0.2	1216.53	P02666|CASB_BOVIN	45	63	19	399000	0	0	0
K.IEKFQS(+79.97)EEQQQTEDELQDKIHPF.A	2925.31	0.9	976.111	P02666|CASB_BOVIN	45	67	23	0	0	0	231000
E.KFQS(+79.97)EEQQQTEDELQDK.I	2188.92	2.7	1095.47	P02666|CASB_BOVIN	47	63	17	0	0	147000	0
E.KFQS(+79.97)EEQQQTED.E	1575.61	-0.2	788.812	P02666|CASB_BOVIN	47	58	12	0	0	17700	0
Q.SEEQQQTEDELQDK.I	1705.73	-1.6	853.87	P02666|CASB_BOVIN	50	63	14	0	0	27600	0
Q.S(+79.97)EEQQQTEDELQDK.I	1785.69	1.7	893.856	P02666|CASB_BOVIN	50	63	14	0	0	228000	0
Q.S(+79.97)EEQQQTEDELQDKIHPF.A	2279.96	2.1	1140.99	P02666|CASB_BOVIN	50	67	18	0	0	1260000	0
E.EQQQTEDELQDK.I	1489.65	-0.3	745.834	P02666|CASB_BOVIN	52	63	12	0	0	109000	0
E.QQQTEDELQDK.I	1360.61	0	681.313	P02666|CASB_BOVIN	53	63	11	0	0	191000	0
E.QQQTEDELQDKIHPFAQTQ.S	2283.08	1.5	762.034	P02666|CASB_BOVIN	53	71	19	0	1710000	0	0
E.DELQDKIHPFAQTQ.S	1668.81	1.7	835.414	P02666|CASB_BOVIN	58	71	14	0	679000	0	0
E.DELQDKIHPF.A	1240.61	1.9	621.313	P02666|CASB_BOVIN	58	67	10	52300	13200000	0	0
D.ELQDKIHPFAQTQS.L	1640.82	2.5	821.417	P02666|CASB_BOVIN	59	72	14	0	0	0	447000
D.ELQDKIHPF.A	1125.58	0.8	563.799	P02666|CASB_BOVIN	59	67	9	1950000	5040000	537000	1650000
D.ELQDKIHPFAQTQ.S	1553.78	2.6	777.901	P02666|CASB_BOVIN	59	71	13	0	0	0	82400
E.LQDKIHPF.A	996.539	1.6	499.278	P02666|CASB_BOVIN	60	67	8	0	0	0	720000
L.QDKIHPF.A	883.455	1.1	442.735	P02666|CASB_BOVIN	61	67	7	0	767000	0	0
Q.DKIHPFAQTQ.S	1183.6	2.2	592.808	P02666|CASB_BOVIN	62	71	10	0	435000	113000	0
Q.DKIHPF.A	755.397	0.5	378.706	P02666|CASB_BOVIN	62	67	6	0	3330000	1340000	0
D.KIHPFAQTQ.S	1068.57	3.6	535.295	P02666|CASB_BOVIN	63	71	9	44600	0	0	0
I.HPFAQTQS.L	914.425	0.3	915.432	P02666|CASB_BOVIN	65	72	8	0	0	0	19600
F.AQTQSLVYPFPGPIPNSLPQ.N	2153.12	3.4	1077.57	P02666|CASB_BOVIN	68	87	20	0	4310000	0	0
F.AQTQSLVYPFPGPIPN.S	1727.89	2.4	864.953	P02666|CASB_BOVIN	68	83	16	0	3900000	0	0
F.AQTQSLVYPFPGPIPNSLPQNIPPLTQTPVVVPPFLQPEVMGV.S	4606.46	6.4	1536.5	P02666|CASB_BOVIN	68	110	43	152000	0	0	0
F.AQTQSLVYPFPGPIPNSLPQNIPPLTQTPVVVPPFLQPEVM.G	4450.36	-1.4	1113.6	P02666|CASB_BOVIN	68	108	41	0	839000	0	0
F.AQTQSLVYPFPGPIPNSLPQNIPPLTQTPVVVPPFLQPEVMGVSKVKEAMAPK.H	5676.05	5	1420.03	P02666|CASB_BOVIN	68	120	53	1330000	0	0	0
Q.SLVYPFPGPIPNSLPQ.N	1724.91	1.5	863.465	P02666|CASB_BOVIN	72	87	16	0	3390000	0	0
Q.SLVYPFPGPIPN.S	1299.69	1.1	650.851	P02666|CASB_BOVIN	72	83	12	0	1260000	0	0
Q.SLVYPFPGPIPNSLPQNIPPLTQTPVVVPPFLQPEVM.G	4022.16	8.9	1341.74	P02666|CASB_BOVIN	72	108	37	0	288000	0	0
L.VYPFPGPIPNSLPQ.N	1524.8	7.4	1525.82	P02666|CASB_BOVIN	74	87	14	0	360000	0	0
V.YPFPGPIPN.S	1000.5	1.3	1001.51	P02666|CASB_BOVIN	75	83	9	0	0	0	277000
N.SLPQNIPPLTQTPVVVPPFLQPEVM.G	2740.49	1.1	1371.25	P02666|CASB_BOVIN	84	108	25	0	52800000	0	0
N.SLPQNIPPLTQTPVVVPPFLQPE.V	2510.38	1.2	1256.2	P02666|CASB_BOVIN	84	106	23	0	22800000	0	0
N.SLPQNIPPLTQTPVVVPPFLQPEVM(+15.99).G	2756.48	0.8	919.835	P02666|CASB_BOVIN	84	108	25	0	1800000	0	0
N.SLPQNIPPLTQTPVVVPPFLQPEVMGV.S	2896.58	5.3	1449.3	P02666|CASB_BOVIN	84	110	27	0	2850000	0	75300
P.QNIPPLTQTPVVVPPFLQPEVM.G	2443.32	2.6	1222.67	P02666|CASB_BOVIN	87	108	22	0	0	119000	0
P.QNIPPLTQTPVVVPPFLQPEVMGV.S	2599.41	1	1300.71	P02666|CASB_BOVIN	87	110	24	0	0	1570000	0
Q.NIPPLTQTPV.V	1078.6	3	1079.61	P02666|CASB_BOVIN	88	97	10	0	6560000	0	0
Q.NIPPLTQTPVVVPPFLQPEVMGV.S	2471.35	3.9	1236.69	P02666|CASB_BOVIN	88	110	23	0	5290000	0	0
Q.NIPPLTQTPVVVPPFLQPEVM(+15.99).G	2331.25	1.1	1166.64	P02666|CASB_BOVIN	88	108	21	0	4610000	0	144000
Q.NIPPLTQTPVVVPPFLQPEVM.G	2315.26	1	1158.64	P02666|CASB_BOVIN	88	108	21	0	74900000	0	0
Q.NIPPLTQTPVVVPPFLQPEVMGVS.K	2558.38	1.9	1280.2	P02666|CASB_BOVIN	88	111	24	0	3640000	0	0
Q.NIPPLTQTPVVVPPFLQPE.V	2085.15	1.5	1043.58	P02666|CASB_BOVIN	88	106	19	0	28000000	0	0
N.IPPLTQTPVVVPPFLQPEVM.G	2201.22	-3.3	1101.61	P02666|CASB_BOVIN	89	108	20	0	350000	0	0
L.TQTPVVVPPFLQPEVM.G	1780.94	0.6	891.48	P02666|CASB_BOVIN	93	108	16	0	986000	0	0
L.TQTPVVVPPFLQPE.V	1550.83	0.5	776.425	P02666|CASB_BOVIN	93	106	14	0	1250000	0	0
V.VVPPFLQPEVM.G	1254.67	2.8	1255.68	P02666|CASB_BOVIN	98	108	11	0	3240000	0	0
V.VVPPFLQPEVMGV.S	1410.76	-0.8	706.386	P02666|CASB_BOVIN	98	110	13	121000	0	0	0
V.VVPPFLQPE.V	1024.56	1	513.288	P02666|CASB_BOVIN	98	106	9	0	1440000	0	0
E.VMGVSKVKEAMAPKHKEMPFPKYPVEPF.T	3200.66	4.9	801.176	P02666|CASB_BOVIN	107	134	28	0	2830000	0	0
M.GVSKVKEAMAPK.H	1243.7	-0.2	415.572	P02666|CASB_BOVIN	109	120	12	14500	0	44900	0
M.GVSKVKEAMAPKHKEMPFPKYPVEPF.T	2970.55	3.7	991.194	P02666|CASB_BOVIN	109	134	26	0	1800000	0	0
V.SKVKEAMAPKHK.E	1352.76	1.9	677.388	P02666|CASB_BOVIN	111	122	12	233000	0	2490	177000
V.SKVKEAMAPKH.K	1224.66	-0.2	409.229	P02666|CASB_BOVIN	111	121	11	29100	0	0	29100
V.SKVKEAMAPK.H	1087.61	0.3	363.543	P02666|CASB_BOVIN	111	120	10	420000	0	0	628000
V.SKVKEAMAP.K	959.511	3	480.764	P02666|CASB_BOVIN	111	119	9	155000	0	0	0
S.KVKEAMAPK.H	1000.57	2.2	501.295	P02666|CASB_BOVIN	112	120	9	49800	0	334000	190000
S.KVKEAMAP.K	872.479	-0.1	437.247	P02666|CASB_BOVIN	112	119	8	0	0	0	11800
K.VKEAMAPK.H	872.479	2.4	437.248	P02666|CASB_BOVIN	113	120	8	86300	0	0	60400
K.VKEAMAPKHK.E	1137.63	1.8	569.825	P02666|CASB_BOVIN	113	122	10	21600	0	0	0
V.KEAMAPK.H	773.41	2.8	387.714	P02666|CASB_BOVIN	114	120	7	80000	0	0	34400
K.EAMAPKHKEMPFPKYPVEPF.T	2372.17	1.3	791.732	P02666|CASB_BOVIN	115	134	20	0	1640000	0	0
E.AMAPKHKEMPFPKYPVEPF.T	2243.13	4.6	1122.58	P02666|CASB_BOVIN	116	134	19	0	46400000	67600	0
A.MAPKHKEMPFPKYPVEPF.T	2172.09	0.5	1087.05	P02666|CASB_BOVIN	117	134	18	0	72300000	1000000	0
A.MAPKHKEM(+15.99)PFPKYPVEPF.T	2188.09	2.3	730.371	P02666|CASB_BOVIN	117	134	18	0	3730000	0	0
A.MAPKHKEMPFPKYPVEPFTE.S	2402.18	3.1	801.736	P02666|CASB_BOVIN	117	136	20	0	6350000	0	0
A.MAPKHKEMPFPKYPVEPFTESQ.S	2617.27	2.4	873.433	P02666|CASB_BOVIN	117	138	22	0	2120000	0	0
M.APKHKEMPFPKYPVEPF.T	2041.05	2.8	1021.53	P02666|CASB_BOVIN	118	134	17	0	50500000	0	0
M.APKHK(+15.99)EMPFPKYPVEPF.T	2057.04	0.5	686.689	P02666|CASB_BOVIN	118	134	17	0	1300000	0	0
M.APKHKEMPFPKYPVEPFTESQ.S	2486.23	2.8	829.753	P02666|CASB_BOVIN	118	138	21	0	664000	0	0
M.APKHKEMPFPK.Y	1308.7	0.5	437.241	P02666|CASB_BOVIN	118	128	11	0	0	19900	0
M.APKHKEMPFPKYPVEPFTE.S	2271.14	2.3	758.056	P02666|CASB_BOVIN	118	136	19	0	1290000	0	0
P.KHKEMPFPKYPVEPFTESQSL.T	2518.26	2.7	840.428	P02666|CASB_BOVIN	120	140	21	0	0	677000	0
P.KHKEMPFPKYPVEPF.T	1872.96	-0.5	625.327	P02666|CASB_BOVIN	120	134	15	0	0	748000	0
K.HKEMPFPKYPVEPF.T	1744.86	3.6	873.443	P02666|CASB_BOVIN	121	134	14	144000	13100000	3580000	308000
K.HKEMPFPKYPVEPFTE.S	1974.95	0.5	988.485	P02666|CASB_BOVIN	121	136	16	0	7320000	0	0
K.HKEMPFPKYPVEPFTESQ.S	2190.05	0.9	1096.03	P02666|CASB_BOVIN	121	138	18	0	8690000	161000	256000
K.HKEMPFPKYPVEPFTESQSL.T	2390.16	1.7	1196.09	P02666|CASB_BOVIN	121	140	20	14700000	0	6200000	12100000
K.HKEM(+15.99)PFPKYPVEPFTESQSL.T	2406.16	0.6	803.06	P02666|CASB_BOVIN	121	140	20	0	0	0	310000
K.EMPFPKYPVEPFTESQSL.T	2125.01	4.6	1063.52	P02666|CASB_BOVIN	123	140	18	2400000	0	904000	1150000
K.EMPFPKYPVEPF.T	1479.71	1	740.863	P02666|CASB_BOVIN	123	134	12	0	0	716000	0
E.MPFPKYPVEPFTESQSL.T	1995.97	0.3	998.99	P02666|CASB_BOVIN	124	140	17	0	0	1160000	505000
F.TESQSLTLTDVENLHLPLPLLQSWMHQPHQPLPPT.V	3997.04	1.6	1000.27	P02666|CASB_BOVIN	135	169	35	0	5290000	0	0
Q.SLTLTDVENLHLPLPLLQSW.M	2288.24	1.5	1145.13	P02666|CASB_BOVIN	139	158	20	0	46200	0	0
Q.SLTLTDVENLHLPLPLLQSWMHQPHQPLPPT.V	3551.86	0.6	1184.96	P02666|CASB_BOVIN	139	169	31	0	321000	0	0
L.TLTDVENL.H	903.455	-0.1	904.462	P02666|CASB_BOVIN	141	148	8	0	0	0	1190000
L.TLTDVEN.L	790.371	1.7	791.38	P02666|CASB_BOVIN	141	147	7	272000	0	0	333000
L.TLTDVENLHLPLPLLQSWMHQPHQPLPPT.V	3351.74	2.8	1118.26	P02666|CASB_BOVIN	141	169	29	0	1210000	0	0
T.DVENLHLPLPLLQ.S	1499.83	1.2	750.926	P02666|CASB_BOVIN	144	156	13	0	174000	0	0
T.DVENLHLPLPLLQSWM.H	1903.99	0.6	953.001	P02666|CASB_BOVIN	144	159	16	0	821000	0	0
T.DVENLHLPLPLLQSWMHQPHQPLPPT.V	3036.56	3.4	1013.2	P02666|CASB_BOVIN	144	169	26	0	8410000	0	0
D.VENLHLPLPLLQSW.M	1657.92	-1	829.966	P02666|CASB_BOVIN	145	158	14	0	1260000	0	0
D.VENLHLPLPLLQ.S	1384.81	1.1	693.412	P02666|CASB_BOVIN	145	156	12	0	1120000	0	0
D.VENLHLPLPLLQSWMHQPHQPLPPT.V	2921.54	-1.5	974.852	P02666|CASB_BOVIN	145	169	25	0	1160000	0	0
E.NLHLPLPLLQ.S	1156.7	1.1	579.356	P02666|CASB_BOVIN	147	156	10	0	1350000	0	0
E.NLHLPLPLLQSWMHQPHQPLPPT.V	2693.43	1.6	898.818	P02666|CASB_BOVIN	147	169	23	0	2400000	0	0
N.LHLPLPLLQSW.M	1315.77	1.7	658.891	P02666|CASB_BOVIN	148	158	11	0	129000	0	0
N.LHLPLPLLQ.S	1042.65	0.8	522.335	P02666|CASB_BOVIN	148	156	9	0	314000	0	0
H.LPLPLLQSWMHQPHQPLPPTVMFPPQSVLSL.S	3527.88	1.5	1176.97	P02666|CASB_BOVIN	150	180	31	0	0	190000	0
L.LQSWMHQPHQPLPPTVMFPPQSVL.S	2794.41	1.8	1398.21	P02666|CASB_BOVIN	155	178	24	0	467000	0	0
L.LQSWMHQPHQPLPPT.V	1795.88	0.7	898.949	P02666|CASB_BOVIN	155	169	15	0	6070000	0	0
L.LQSWMHQPHQPLPPTVMFPPQ.S	2495.22	-2	1248.62	P02666|CASB_BOVIN	155	175	21	0	14900000	0	0
L.LQSWMHQPHQPLPPTVM.F	2025.99	2.8	1014.01	P02666|CASB_BOVIN	155	171	17	0	297000	0	0
L.LQSWMHQPHQPLPPTVMFPPQSV.L	2681.32	0.7	894.783	P02666|CASB_BOVIN	155	177	23	0	2000000	0	0
L.LQSWMHQPHQPLPPTVMFPPQS.V	2582.26	0.6	861.76	P02666|CASB_BOVIN	155	176	22	0	710000	0	0
Q.SWMHQPHQPLPPT.V	1554.74	1.3	778.378	P02666|CASB_BOVIN	157	169	13	0	38900000	0	0
Q.SWMHQPHQPLPPTVMFPPQ.S	2254.08	0.4	1128.05	P02666|CASB_BOVIN	157	175	19	0	41800000	0	0
Q.SWMHQPHQPLPPTVMFPPQSVL.S	2553.27	2.7	1277.64	P02666|CASB_BOVIN	157	178	22	0	6200000	0	0
Q.SWMHQPHQPLPPTVM.F	1784.85	3.2	893.435	P02666|CASB_BOVIN	157	171	15	0	5370000	0	0
Q.SWM(+15.99)HQPHQPLPPT.V	1570.74	0.7	786.375	P02666|CASB_BOVIN	157	169	13	0	3420000	0	0
Q.SW(+15.99)M(+15.99)HQPHQPLPPT.V	1586.73	-0.6	794.372	P02666|CASB_BOVIN	157	169	13	0	1820000	0	0
Q.SWMHQPHQPLP(+15.99)PTVMFPPQ.S	2270.08	10.2	1136.06	P02666|CASB_BOVIN	157	175	19	0	1010000	0	0
S.WMHQPHQPLPPT.V	1467.71	1.1	734.862	P02666|CASB_BOVIN	158	169	12	0	1290000	0	0
W.MHQPHQPLPPT.V	1281.63	0	641.822	P02666|CASB_BOVIN	159	169	11	0	27100000	0	0
W.MHQPHQPLPPTVMFPPQ.S	1980.97	-0.1	991.492	P02666|CASB_BOVIN	159	175	17	0	9140000	0	0
W.MHQPHQPLPPTVM.F	1511.74	1.2	756.877	P02666|CASB_BOVIN	159	171	13	0	17300000	0	0
W.M(+15.99)HQPHQPLPPT.V	1297.62	0	649.819	P02666|CASB_BOVIN	159	169	11	0	4290000	0	0
W.MH(+15.99)QPHQPLPPT.V	1297.62	0.9	649.82	P02666|CASB_BOVIN	159	169	11	0	2020000	0	0
W.MHQPHQPLPPTVM(+15.99).F	1527.73	2	764.875	P02666|CASB_BOVIN	159	171	13	0	718000	0	0
W.M(+15.99)HQPHQPLPPTVM(+15.99).F	1543.73	0.6	772.871	P02666|CASB_BOVIN	159	171	13	0	475000	0	0
M.HQPHQPLPPTVM.F	1380.7	1.6	691.357	P02666|CASB_BOVIN	160	171	12	0	6470000	0	0
M.HQPHQPLPPT.V	1150.59	1.5	576.302	P02666|CASB_BOVIN	160	169	10	0	2020000	0	750000
Q.PHQPLPPTVMFPPQSVL.S	1884	1.9	943.007	P02666|CASB_BOVIN	162	178	17	0	1840000	0	0
T.VMFPPQSVL.S	1016.54	0.6	509.276	P02666|CASB_BOVIN	170	178	9	0	41900000	0	0
M.FPPQSVL.S	786.428	0.4	787.435	P02666|CASB_BOVIN	172	178	7	0	2740000	0	0
Q.SVLSLSQSKVLPVPQ.K	1580.91	-0.2	791.464	P02666|CASB_BOVIN	176	190	15	0	195000	0	0
L.SLSQSKVLPVPQKAVPYPQ.R	2065.16	1.6	1033.59	P02666|CASB_BOVIN	179	197	19	0	21800000	0	0
L.SLSQSKVLPVPQKAVPYPQRDMPIQAF.L	3023.63	3.2	1008.89	P02666|CASB_BOVIN	179	205	27	0	9430000	0	0
L.SLSQSKVLPVPQ.K	1281.73	1.8	641.873	P02666|CASB_BOVIN	179	190	12	0	9270000	0	0
L.SLSQSKVLPVPQKAVPYPQRDMPIQ.A	2805.52	0.6	936.182	P02666|CASB_BOVIN	179	203	25	0	4210000	0	0
L.SLSQSKVLPVPQKAVPYPQRDMPIQAFLL.Y	3249.79	2.3	1084.27	P02666|CASB_BOVIN	179	207	29	0	999000	0	0
L.SLSQSKVLPVPQKAVPYPQRDMPIQAFL.L	3136.71	2.7	1046.58	P02666|CASB_BOVIN	179	206	28	0	963000	0	0
S.KVLPVPQ.K	779.49	1.1	390.753	P02666|CASB_BOVIN	184	190	7	0	217000	0	0
Q.KAVPYPQRDMPIQAF.L	1759.91	1.6	880.963	P02666|CASB_BOVIN	191	205	15	0	7170000	1040000	0
Q.KAVPYPQRDMPIQ.A	1541.8	1.4	771.909	P02666|CASB_BOVIN	191	203	13	0	1520000	0	0
A.VPYPQRDMPIQA.F	1413.71	2.2	707.862	P02666|CASB_BOVIN	193	204	12	0	0	0	328000
A.VPYPQRDMPIQ.A	1342.67	1.1	672.343	P02666|CASB_BOVIN	193	203	11	0	0	0	265000
A.VPYPQRDMPIQAF.L	1560.78	2.2	781.397	P02666|CASB_BOVIN	193	205	13	0	0	0	99300
D.MPIQAFLLYQEPVLGPVRGPFPIIV	2793.57	4.6	1397.8	P02666|CASB_BOVIN	200	224	25	0	0	0	789000
Q.AFLLYQEPVLGPVRGPFPIIV	2324.33	3	1163.18	P02666|CASB_BOVIN	204	224	21	0	1450000	0	0
F.LLYQEPVLGPVRGPFPII.V	2007.16	2.2	1004.59	P02666|CASB_BOVIN	206	223	18	0	295000	0	0
F.LLYQEPVLGPVRGPFPIIV	2106.22	2	1054.12	P02666|CASB_BOVIN	206	224	19	8890000	128000000	0	852000
F.LLYQEPVL.G	973.548	1.6	487.782	P02666|CASB_BOVIN	206	213	8	0	328000	0	0
L.LYQEPVLGPVRGPFPIIV	1993.14	1.1	997.578	P02666|CASB_BOVIN	207	224	18	6830000	24000000	3430000	396000
L.LYQEPVLGPVRGPFPII.V	1894.07	2.7	948.046	P02666|CASB_BOVIN	207	223	17	0	354000	0	0
L.YQEPVLGPVRGPFPIIV	1880.06	0.8	941.036	P02666|CASB_BOVIN	208	224	17	0	46100000	4200000	5760000
L.YQEPVLGPVRGPFP.I	1554.82	1.4	778.418	P02666|CASB_BOVIN	208	221	14	0	0	173000	3420000
Y.QEPVLGPVRGPFPIIV	1716.99	-0.2	859.503	P02666|CASB_BOVIN	209	224	16	0	113000000	30400000	1800000
Y.QEPVLGPVRGPFP.I	1391.76	2.9	696.887	P02666|CASB_BOVIN	209	221	13	0	0	0	1310000
Y.QEPVLGPVRGPFPII.V	1617.92	0.1	809.969	P02666|CASB_BOVIN	209	223	15	0	332000	0	0
Q.EPVLGPVRGPFPIIV	1588.93	-0.1	795.474	P02666|CASB_BOVIN	210	224	15	1670000	3010000	5510000	976000
Q.EPVLGPVRGPFP.I	1263.7	1	632.857	P02666|CASB_BOVIN	210	221	12	0	0	0	417000
E.PVLGPVRGPFPIIV	1459.89	1.2	730.954	P02666|CASB_BOVIN	211	224	14	8870000	752000	225000	1880000
E.PVLGPVRGPFP.I	1134.65	1.6	568.336	P02666|CASB_BOVIN	211	221	11	0	0	0	410000
V.LGPVRGPFPIIV	1263.77	1.6	632.893	P02666|CASB_BOVIN	213	224	12	545000	0	0	0
L.GPVRGPFPIIV	1150.69	1.8	576.351	P02666|CASB_BOVIN	214	224	11	1170000	24200000	26600	7490000
L.GPVRGPFP.I	825.45	1.1	413.733	P02666|CASB_BOVIN	214	221	8	0	0	0	245000
G.PVRGPFPIIV	1093.66	1.8	547.841	P02666|CASB_BOVIN	215	224	10	703000	0	0	482000
A.RPKHPIKHQGLPQEVLN.E	1990.12	1.7	996.07	P02662|CASA1_BOVIN	16	32	17	4080000	586000	4480000	2120000
A.RPKHPIKHQGLPQEVL.N	1876.08	2.2	939.049	P02662|CASA1_BOVIN	16	31	16	171000	10600000	674000	0
A.RPKHPIKHQGLPQ.E	1534.88	-0.1	768.449	P02662|CASA1_BOVIN	16	28	13	334000	11100000	988000	722000
A.RPKHPIKHQ.G	1139.67	-0.8	570.841	P02662|CASA1_BOVIN	16	24	9	112000	6060000	0	40900
A.RPKHPIKHQGLPQEVLNENLLRFF.V	2909.61	3.8	970.882	P02662|CASA1_BOVIN	16	39	24	5080000	0	0	418000
A.RPKHPIKHQGLPQEVLNENLLRF.F	2762.55	5.5	921.861	P02662|CASA1_BOVIN	16	38	23	2310000	0	0	3240000
A.RPKHPIKHQGLPQEVLNENLLR.F	2615.48	4.9	872.837	P02662|CASA1_BOVIN	16	37	22	1940000	0	0	689000
A.RPKHPIKHQGLPQEVLNEN.L	2233.21	3.6	745.413	P02662|CASA1_BOVIN	16	34	19	1190000	0	382000	508000
A.RPKHPIKH.Q	1011.61	0.5	506.812	P02662|CASA1_BOVIN	16	23	8	463000	1480000	0	194000
A.RPKHPIKHQGLPQEV.L	1763	2.7	588.674	P02662|CASA1_BOVIN	16	30	15	758000	0	0	0
A.RPKHPIKHQGL.P	1309.77	3.6	437.6	P02662|CASA1_BOVIN	16	26	11	13900	0	0	0
A.RPKHPIKHQGLPQE.V	1663.93	2.3	555.651	P02662|CASA1_BOVIN	16	29	14	56000	0	44300	108000
A.RPKHPIK.H	874.55	1	438.283	P02662|CASA1_BOVIN	16	22	7	36900	0	0	241000
A.RPKHPIKHQGLP.Q	1406.83	2.6	469.95	P02662|CASA1_BOVIN	16	27	12	326000	0	0	0
A.RPKH(+15.99)PIKHQ.G	1155.66	4.9	386.23	P02662|CASA1_BOVIN	16	24	9	0	44600	0	0
A.RPK(+15.99)HPIKHQ.G	1155.66	-3.2	386.227	P02662|CASA1_BOVIN	16	24	9	0	44600	0	0
A.RPKHPIKHQG.L	1196.69	1	399.904	P02662|CASA1_BOVIN	16	25	10	9000	0	0	0
A.RPKHPIKHQGLPQEVLNENLL.R	2459.38	1.5	820.801	P02662|CASA1_BOVIN	16	36	21	5490000	0	0	2000000
P.KHPIKHQGLPQ.E	1281.73	0	641.873	P02662|CASA1_BOVIN	18	28	11	27300	2150000	0	186000
P.KHPIKHQGLPQEVL.N	1622.93	0.7	812.471	P02662|CASA1_BOVIN	18	31	14	0	2790000	157000	0
P.KHPIKHQ.G	886.514	1.3	444.265	P02662|CASA1_BOVIN	18	24	7	16700	0	0	0
P.KHPIKHQGLPQEVLNENLLRF.F	2509.39	2.4	837.473	P02662|CASA1_BOVIN	18	38	21	1280000	0	0	324000
P.KHPIKHQGLPQEVLNENLLR.F	2362.32	0.7	788.449	P02662|CASA1_BOVIN	18	37	20	431000	0	0	1380000
P.KHPIKHQGLPQEVLNENLLRFF.V	2656.46	4.8	886.498	P02662|CASA1_BOVIN	18	39	22	838000	0	0	0
P.KHPIKHQGLPQEVLNEN.L	1980.05	4.9	661.029	P02662|CASA1_BOVIN	18	34	17	478000	0	415000	0
K.HPIKHQGLPQEV.L	1381.75	0.3	691.881	P02662|CASA1_BOVIN	19	30	12	0	0	0	101000
K.HPIKHQGLPQ.E	1153.64	0.4	577.825	P02662|CASA1_BOVIN	19	28	10	0	832000	0	430000
K.HPIKHQGLPQEVL.N	1494.83	1	748.423	P02662|CASA1_BOVIN	19	31	13	0	279000	0	0
K.HPIKHQGLPQEVLN.E	1608.87	2.3	805.446	P02662|CASA1_BOVIN	19	32	14	0	0	0	862000
K.HPIKHQGLPQE.V	1282.68	0.6	642.347	P02662|CASA1_BOVIN	19	29	11	0	0	0	186000
K.HPIKHQGLPQEVLNEN.L	1851.96	1.8	926.989	P02662|CASA1_BOVIN	19	34	16	0	0	0	37100
K.HQGLPQEVLNENLLR.F	1758.94	1.3	880.477	P02662|CASA1_BOVIN	23	37	15	0	0	0	195000
K.HQGLPQE.V	807.388	2.2	808.396	P02662|CASA1_BOVIN	23	29	7	0	0	0	10500
Q.GLPQEVLNENLLRF.F	1640.89	1.2	821.453	P02662|CASA1_BOVIN	25	38	14	0	0	1750000	0
Q.GLPQEVLNENLLRFF.V	1787.96	1.4	894.987	P02662|CASA1_BOVIN	25	39	15	0	0	3200000	0
Q.GLPQEVLNENLLR.F	1493.82	1	747.918	P02662|CASA1_BOVIN	25	37	13	0	0	512000	0
Q.GLPQEVLNENLL.R	1337.72	0	669.867	P02662|CASA1_BOVIN	25	36	12	0	0	355000	0
Q.EVLNENLLR.F	1098.6	1.1	550.309	P02662|CASA1_BOVIN	29	37	9	0	0	0	1100000
Q.EVLNENLLRF.F	1245.67	0.9	623.844	P02662|CASA1_BOVIN	29	38	10	0	0	0	146000
E.VLNENLLRF.F	1116.63	0.7	559.322	P02662|CASA1_BOVIN	30	38	9	0	0	0	64000
E.VLNENLLR.F	969.561	1.6	485.788	P02662|CASA1_BOVIN	30	37	8	0	0	0	540000
V.LNENLLR.F	870.492	1.4	436.254	P02662|CASA1_BOVIN	31	37	7	0	0	0	55000
L.NENLLRFF.V	1051.55	1.5	526.781	P02662|CASA1_BOVIN	32	39	8	0	0	41700	0
F.FVAPFPEVFGKE.K	1365.7	1.8	683.857	P02662|CASA1_BOVIN	39	50	12	0	372000	0	0
F.FVAPFPEVFGKEKV.N	1592.86	0.1	797.437	P02662|CASA1_BOVIN	39	52	14	1230000	0	348000	0
F.VAPFPEVFGKE.K	1218.63	0.7	610.322	P02662|CASA1_BOVIN	40	50	11	0	445000	0	0
F.VAPFPEVFGK.E	1089.59	1.4	1090.59	P02662|CASA1_BOVIN	40	49	10	0	0	0	562000
F.VAPFPEVFGKEKV.N	1445.79	2.4	723.905	P02662|CASA1_BOVIN	40	52	13	509000	0	3700000	2000000
V.APFPEVFGK.E	990.517	2.2	496.267	P02662|CASA1_BOVIN	41	49	9	0	0	0	386000
V.APFPEVFGKEKV.N	1346.72	0.9	674.37	P02662|CASA1_BOVIN	41	52	12	1030000	0	0	2490000
V.APFPEVFG.K	862.423	-0.6	863.429	P02662|CASA1_BOVIN	41	48	8	0	0	0	84800
A.PFPEVFGKEKV.N	1275.69	0.9	638.851	P02662|CASA1_BOVIN	42	52	11	0	0	800000	326000
P.EVFGKEKV.N	934.512	3.3	468.265	P02662|CASA1_BOVIN	45	52	8	0	0	0	41700
E.VFGKEKVN.E	919.513	0.8	460.764	P02662|CASA1_BOVIN	46	53	8	0	195000	0	0
N.ELSKDIGS(+79.97)ES(+79.97)TE.D	1453.53	1.7	727.772	P02662|CASA1_BOVIN	54	65	12	0	912000	0	0
N.ELSKDIGS(+79.97)ES(+79.97)TEDQAM.E	1898.69	1.7	950.354	P02662|CASA1_BOVIN	54	69	16	0	1050000	0	0
L.SKDIGS(+79.97)ES(+79.97)TEDQAM.E	1656.56	1.2	829.29	P02662|CASA1_BOVIN	56	69	14	0	264000	0	0
M.EDIKQMEAE.S	1091.48	1.3	546.748	P02662|CASA1_BOVIN	70	78	9	0	60900	0	0
N.S(+79.97)VEQKHIQKEDVPSERYL.G	2264.08	1	755.703	P02662|CASA1_BOVIN	90	107	18	222000	0	0	135000
N.S(+79.97)VEQKHIQ.K	1047.47	0.8	524.745	P02662|CASA1_BOVIN	90	97	8	0	1160000	0	0
N.SVEQKHIQKE.D	1224.65	0.5	409.223	P02662|CASA1_BOVIN	90	99	10	0	37700	0	0
N.S(+79.97)VEQKHIQKE.D	1304.61	-0.1	653.313	P02662|CASA1_BOVIN	90	99	10	0	3430000	0	0
K.HIQKEDVPSERYL.G	1612.82	1.3	807.419	P02662|CASA1_BOVIN	95	107	13	260000	0	0	0
K.HIQKEDVPSER.Y	1336.67	0.3	669.344	P02662|CASA1_BOVIN	95	105	11	687000	0	0	332000
K.HIQKEDVPSE.R	1180.57	-1.1	591.293	P02662|CASA1_BOVIN	95	104	10	139000	0	0	41500
K.HIQKEDVPSERY.L	1499.74	0.1	500.92	P02662|CASA1_BOVIN	95	106	12	58000	0	0	0
K.HIQKEDVPS.E	1051.53	0.7	526.773	P02662|CASA1_BOVIN	95	103	9	26300	0	0	38300
H.IQKEDVPSERYL.G	1475.76	-1.4	738.887	P02662|CASA1_BOVIN	96	107	12	0	0	25000	0
Q.KEDVPSERYL.G	1234.62	2	618.318	P02662|CASA1_BOVIN	98	107	10	0	0	330000	0
Q.KEDVPSE.R	802.371	0.7	803.379	P02662|CASA1_BOVIN	98	104	7	0	0	0	15800
E.DVPSERYL.G	977.482	1.7	489.749	P02662|CASA1_BOVIN	100	107	8	0	0	42400	0
D.VPSERYL.G	862.455	3	432.236	P02662|CASA1_BOVIN	101	107	7	470000	0	0	222000
E.QLLRLKKYKVPQ.L	1512.95	0.8	505.325	P02662|CASA1_BOVIN	112	123	12	0	101000	0	0
L.LRLKKYKVPQLE.I	1513.93	1.9	505.653	P02662|CASA1_BOVIN	114	125	12	0	87000	0	0
L.RLKKYKVPQ.L	1158.72	0.2	580.369	P02662|CASA1_BOVIN	115	123	9	0	2710000	0	0
N.S(+79.97)AEERLHSM.K	1138.45	0.5	570.231	P02662|CASA1_BOVIN	130	138	9	0	0	164000	0
H.SMKEGIHAQ.Q	999.481	1.2	500.748	P02662|CASA1_BOVIN	137	145	9	0	66600	0	0
M.KEGIHAQ.Q	781.408	0.7	391.712	P02662|CASA1_BOVIN	139	145	7	0	0	21500	0
Q.QKEPMIGVNQELAY.F	1618.8	2.8	810.411	P02662|CASA1_BOVIN	146	159	14	0	309000	2780000	0
Q.QKEPMIGVNQ.E	1142.58	2.5	572.296	P02662|CASA1_BOVIN	146	155	10	0	0	163000	0
F.YPELFRQ.F	951.481	1.8	476.749	P02662|CASA1_BOVIN	161	167	7	0	0	0	670000
Y.YVPLGTQYTDAPSF.S	1557.74	4.1	779.878	P02662|CASA1_BOVIN	181	194	14	479000	0	0	0
Y.YVPLGTQYTDAPSFSDIPNPIGSENSEKTTMPLW	3754.77	1.4	1252.6	P02662|CASA1_BOVIN	181	214	34	5860000	0	2840000	2310000
Y.YVPLGTQY.T	939.47	5	940.482	P02662|CASA1_BOVIN	181	188	8	215000	0	0	0
Y.VPLGTQYTDAPSF.S	1394.67	1.6	698.344	P02662|CASA1_BOVIN	182	194	13	0	0	0	1920000
L.GTQYTDAPSFSDIPNPIGSE.N	2094.94	0.9	1048.48	P02662|CASA1_BOVIN	185	204	20	0	1820000	0	0
Y.TDAPSFSDIPNPIGSE.N	1645.75	1.7	823.882	P02662|CASA1_BOVIN	189	204	16	0	94100	0	0
Y.TDAPSFSDIPNPIGSENSEKTTMPLW	2833.31	4.2	1417.67	P02662|CASA1_BOVIN	189	214	26	1310000	0	1230000	1580000
Y.TDAPSFSDIPNPIGSENSE.K	1975.86	0.5	988.94	P02662|CASA1_BOVIN	189	207	19	0	310000	0	0
D.APSFSDIPNPIGSENSEKTTMPLW	2617.24	-0.1	1309.63	P02662|CASA1_BOVIN	191	214	24	17400000	2590000	3350000	6940000
D.APSFSDIPNPIGSENSEK.T	1887.88	2.7	944.952	P02662|CASA1_BOVIN	191	208	18	0	198000	0	0
D.APSFSDIPNPIGSENSEKTTM(+15.99)PLW	2633.23	2.2	1317.63	P02662|CASA1_BOVIN	191	214	24	2370000	0	0	1190000
D.APSFSDIPNPIGSENSE.K	1759.79	1.4	880.904	P02662|CASA1_BOVIN	191	207	17	0	2570000	0	0
D.APSFSDIPNPIGSEN.S	1543.72	1.7	772.866	P02662|CASA1_BOVIN	191	205	15	849000	165000	207000	541000
D.APSFSDIPNPIGSE.N	1429.67	0.8	715.844	P02662|CASA1_BOVIN	191	204	14	0	1880000	0	0
D.APSFSDIPNPIGSENSEKTTMPLW(+15.99)	2633.23	2.8	1317.63	P02662|CASA1_BOVIN	191	214	24	1130000	0	0	0
D.APSFSDIPNPIGSENSEKTTMP.L	2318.07	1.4	1160.05	P02662|CASA1_BOVIN	191	212	22	0	0	0	8050000
P.SFSDIPNPIGSENSEKTTMPLW	2449.15	4	1225.59	P02662|CASA1_BOVIN	193	214	22	2670000	0	0	4340000
P.SFSDIPNPIGSENSEKTTM(+15.99)PLW	2465.14	2.2	1233.58	P02662|CASA1_BOVIN	193	214	22	0	0	0	398000
P.SFSDIPNPIGSENSEKTTMP.L	2149.98	0.6	1076	P02662|CASA1_BOVIN	193	212	20	0	0	0	4910000
S.FSDIPNPIGSENSEKTTMPLW	2362.11	1.2	1182.07	P02662|CASA1_BOVIN	194	214	21	0	264000	18100000	0
S.FSDIPNPIGSENSEKTTM(+15.99)PLW	2378.11	-0.1	1190.06	P02662|CASA1_BOVIN	194	214	21	0	0	2900000	0
S.FSDIPNPIGSENSEK.T	1632.76	2.2	817.391	P02662|CASA1_BOVIN	194	208	15	0	0	1230000	0
S.FSDIPNPIGSENSEKTTMPLW(+15.99)	2378.11	-1.6	1190.06	P02662|CASA1_BOVIN	194	214	21	0	0	1450000	0
S.FSDIPNPIGSEN.S	1288.59	0.9	645.305	P02662|CASA1_BOVIN	194	205	12	0	0	293000	0
S.FSDIPNPIGSE.N	1174.55	1.4	1175.56	P02662|CASA1_BOVIN	194	204	11	0	90200	74400	0
S.FSDIPNPIGSENSEKTTMP.L	2062.95	4.7	1032.49	P02662|CASA1_BOVIN	194	212	19	0	0	1740000	0
F.SDIPNPIGSENSEKTTMPLW	2215.05	1	1108.53	P02662|CASA1_BOVIN	195	214	20	34100000	1440000	29700000	29500000
F.SDIPNPIGSENSEKTTM(+15.99)PLW	2231.04	2.2	1116.53	P02662|CASA1_BOVIN	195	214	20	8520000	0	6690000	6780000
F.SDIPNPIGSENSEKT.T	1586.74	2.7	794.381	P02662|CASA1_BOVIN	195	209	15	283000	0	460000	249000
F.SDIPNPIGSENSEK.T	1485.69	3.1	743.857	P02662|CASA1_BOVIN	195	208	14	267000	0	431000	224000
F.SDIPNPIGSEN.S	1141.53	1.4	571.771	P02662|CASA1_BOVIN	195	205	11	0	0	463000	0
F.SDIPNPIGSENSEKTTMP.L	1915.88	2.9	958.952	P02662|CASA1_BOVIN	195	212	18	305000	0	806000	6580000
F.SDIPNPIGSENSEKTTMP(+15.99).L	1931.88	1.6	966.948	P02662|CASA1_BOVIN	195	212	18	0	0	0	108000
F.SDIPNPIGSENSEKTTMPL.W	2028.97	-0.7	1015.49	P02662|CASA1_BOVIN	195	213	19	0	0	0	2900000
S.DIPNPIGSENSEKTTMPLW	2128.01	3	1065.02	P02662|CASA1_BOVIN	196	214	19	634000	165000	7130000	814000
S.DIPNPIGSENSEKTTM(+15.99)PLW	2144.01	1.4	1073.01	P02662|CASA1_BOVIN	196	214	19	0	0	962000	0
D.IPNPIGSENSEKTTMPLW	2012.99	-0.9	1007.5	P02662|CASA1_BOVIN	197	214	18	23000000	0	25400000	14200000
D.IPNPIGSENSEKTTM(+15.99)PLW	2028.98	0	1015.5	P02662|CASA1_BOVIN	197	214	18	0	0	0	1660000
D.IPNPIGSENSEKT.T	1384.68	3.2	693.351	P02662|CASA1_BOVIN	197	209	13	0	0	110000	0
D.IPNPIGSENSEK.T	1283.64	1.3	642.826	P02662|CASA1_BOVIN	197	208	12	0	0	155000	0
D.IPNPIGSENSE.K	1155.54	2.9	1156.55	P02662|CASA1_BOVIN	197	207	11	0	0	266000	0
D.IPNPIGSENSEKTTM(+15.99)P.L	1729.82	1.5	865.918	P02662|CASA1_BOVIN	197	212	16	0	0	0	144000
D.IPNPIGSENSEKTTMPLW(+15.99)	2028.98	2.8	1015.5	P02662|CASA1_BOVIN	197	214	18	3060000	0	0	0
D.IPNPIGSENSEKTTMP.L	1713.82	2.8	857.922	P02662|CASA1_BOVIN	197	212	16	0	0	0	2690000
I.PNPIGSENSEKTTMPL.W	1713.82	2.8	857.922	P02662|CASA1_BOVIN	198	213	16	0	0	0	2440000
P.NPIGSENSEKTTMPLW	1802.85	2	902.434	P02662|CASA1_BOVIN	199	214	16	0	0	683000	1780000
N.PIGSENSEKTTMPLW	1688.81	0.9	845.412	P02662|CASA1_BOVIN	200	214	15	74500000	0	46300000	31200000
N.PIGSENSEKTTM(+15.99)PLW	1704.8	-0.1	853.409	P02662|CASA1_BOVIN	200	214	15	0	0	3850000	0
N.PIGSENSEKTTMPLW(+15.99)	1704.8	2.7	853.411	P02662|CASA1_BOVIN	200	214	15	7560000	0	7320000	4190000
N.PIGSENSEKTTM(+15.99)PLW(+15.99)	1720.8	4.8	861.41	P02662|CASA1_BOVIN	200	214	15	225000	0	0	0
N.PIGSENSEKTTMP.L	1389.64	2	695.831	P02662|CASA1_BOVIN	200	212	13	0	0	0	3570000
N.PIGSENSEKTTM(+15.99)P.L	1405.64	0.4	703.827	P02662|CASA1_BOVIN	200	212	13	0	0	0	258000
N.PIGSENSEK.T	959.456	2.9	480.737	P02662|CASA1_BOVIN	200	208	9	9870	0	0	0
P.IGSENSEKT.T	963.451	2.2	482.734	P02662|CASA1_BOVIN	201	209	9	22100	0	0	0
P.IGSENSEKTTMPLW	1591.76	0.8	796.885	P02662|CASA1_BOVIN	201	214	14	256000	0	0	8240000
G.SENSEKTTMPLW	1421.65	4.8	711.836	P02662|CASA1_BOVIN	203	214	12	3270000	0	0	760000
S.ENSEKTTMPLW	1334.62	2.4	668.318	P02662|CASA1_BOVIN	204	214	11	205000	0	0	1400000
E.NSEKTTMPLW	1205.58	1.1	603.795	P02662|CASA1_BOVIN	205	214	10	0	196000	0	0
N.SEKTTMPLW	1091.53	0.5	546.774	P02662|CASA1_BOVIN	206	214	9	25100000	0	0	3130000
N.SEKTTM(+15.99)PLW	1107.53	5.2	1108.54	P02662|CASA1_BOVIN	206	214	9	222000	0	0	0
N.SEKTTMPLW(+15.99)	1107.53	3.6	554.773	P02662|CASA1_BOVIN	206	214	9	1330000	0	0	0
S.EKTTMPLW	1004.5	1.4	503.258	P02662|CASA1_BOVIN	207	214	8	0	0	0	3380000
E.KTTMPLW	875.457	0.8	438.736	P02662|CASA1_BOVIN	208	214	7	0	0	60000	249000
K.TTMPLW	747.362	-0.3	748.37	P02662|CASA1_BOVIN	209	214	6	0	0	0	796000
T.TMPLW	646.315	3.9	647.325	P02662|CASA1_BOVIN	210	214	5	255000	0	0	0
E.KDERFF.S	840.413	1	421.214	P02668|CASK_BOVIN	34	39	6	0	0	104000	0
A.KYIPIQYVL.S	1135.66	1.4	568.84	P02668|CASK_BOVIN	45	53	9	0	447000	0	0
N.QFLPYPYYAKPA.A	1456.74	2.4	729.379	P02668|CASK_BOVIN	75	86	12	0	91300	0	0
A.AVRSPAQILQ.W	1081.62	1.6	541.82	P02668|CASK_BOVIN	87	96	10	0	637000	0	0
M.AIPPKKNQDKTEIPTIN.T	1906.05	2	954.035	P02668|CASK_BOVIN	128	144	17	0	3430000	0	0
D.S(+79.97)PEVIESPPEINTVQVTSTAV	2276.08	3.5	1139.05	P02668|CASK_BOVIN	170	190	21	3000000	0	2770000	3290000
D.SPEVIESPPEINTVQVTSTAV	2196.12	2.6	1099.07	P02668|CASK_BOVIN	170	190	21	1230000	0	0	1550000
S.PEVIESPPEINTVQVTSTAV	2109.08	1	1055.55	P02668|CASK_BOVIN	171	190	20	883000	0	1300000	499000
P.EVIESPPEINTVQVTSTAV	2012.03	-1	1007.02	P02668|CASK_BOVIN	172	190	19	8340000	0	3540000	10700000
E.VIESPPEINTVQVTSTAV	1882.99	1.9	942.503	P02668|CASK_BOVIN	173	190	18	0	0	205000	209000
E.VIESPPEIN.T	996.513	0.3	499.264	P02668|CASK_BOVIN	173	181	9	0	20100000	0	669000
I.ESPPEINTVQVTSTAV	1670.84	1.3	836.427	P02668|CASK_BOVIN	175	190	16	0	0	25000000	0
I.ESPPEIN.T	784.36	2.4	785.369	P02668|CASK_BOVIN	175	181	7	0	0	235000	0
E.SPPEINTVQVTSTAV	1541.79	1.2	771.905	P02668|CASK_BOVIN	176	190	15	0	0	8570000	0
E.SPPEIN.T	655.318	0.5	656.325	P02668|CASK_BOVIN	176	181	6	0	0	146000	0
N.TVQVTSTAV	904.487	1.7	453.251	P02668|CASK_BOVIN	182	190	9	3700000	74800	557000	2060000
N.TVQVTST.A	734.381	-0.2	735.388	P02668|CASK_BOVIN	182	188	7	0	0	0	314000
T.VQVTSTAV	803.439	0.2	804.446	P02668|CASK_BOVIN	183	190	8	321000	0	0	315000
V.QVTSTAV	704.37	1.1	705.379	P02668|CASK_BOVIN	184	190	7	0	0	0	422000
A.LIVTQTMKGLDIQKVAGTWY.S	2264.22	3	755.751	P02754|LACB_BOVIN	17	36	20	894000	0	0	0
N.PTQLEEQCHI	1196.55	4.9	599.285	P02754|LACB_BOVIN	169	178	10	226000	0	0	70000
A.ILNKPEDETHLE.A	1436.71	-0.4	719.364	P80195|GLCM1_BOVIN	19	30	12	0	324000	0	0
A.ILNKPEDETHLEAQPTDASAQFIRN.L	2836.4	3.3	946.477	P80195|GLCM1_BOVIN	19	43	25	159000	0	0	0
A.ILNKPEDETHLEAQPTDASAQFIR.N	2722.36	2.3	908.461	P80195|GLCM1_BOVIN	19	42	24	870000	0	0	344000
A.ILNKPED.E	827.439	0	414.727	P80195|GLCM1_BOVIN	19	25	7	25900	0	0	0
A.ILNKPEDETHLEAQPTDASAQFI.R	2566.26	6.2	856.431	P80195|GLCM1_BOVIN	19	41	23	0	0	0	649000
I.LNKPEDETHLE.A	1323.63	-0.7	662.822	P80195|GLCM1_BOVIN	20	30	11	0	42300	26600	0
N.KPEDETHLE.A	1096.5	1.1	549.26	P80195|GLCM1_BOVIN	22	30	9	0	0	4420	0
E.DETHLEAQPTDASAQ.F	1611.7	1.9	806.859	P80195|GLCM1_BOVIN	25	39	15	0	0	122000	0
E.DETHLEAQPTDASAQFIR.N	2027.95	3.6	676.995	P80195|GLCM1_BOVIN	25	42	18	0	0	462000	0
E.AQPTDASAQFIRNL.Q	1530.78	2.2	766.399	P80195|GLCM1_BOVIN	31	44	14	0	968000	0	0
E.DLIS(+79.97)KEQIVIR.S	1392.74	1.2	697.377	P80195|GLCM1_BOVIN	61	71	11	0	208000	0	0
E.QIVIRSSRQPQ.S	1310.74	1.7	656.379	P80195|GLCM1_BOVIN	67	77	11	0	510000	0	0
R.SSRQPQSQNPKLPL.S	1578.85	2.4	527.291	P80195|GLCM1_BOVIN	72	85	14	0	1060000	294000	0
R.SSRQPQSQNPKLPLSILKEKHL.R	2527.42	4.3	632.866	P80195|GLCM1_BOVIN	72	93	22	1020000	0	364000	936000
L.KDLKGYGGVSLPE.W	1361.72	1.5	681.868	P00711|LALBA_BOVIN	32	44	13	0	1430000	0	0
A.KNTMEHVS(+79.97)S(+79.97)S(+79.97)EESIISQETYKQEK.N	3051.22	4.8	1018.09	P02663|CASA2_BOVIN	16	39	24	1110000	0	0	0
T.MEHVS(+79.97)S(+79.97)S(+79.97)EESIIS(+79.97)QETYKQEK.N	2788	0.9	930.342	P02663|CASA2_BOVIN	19	39	21	0	0	682000	0
T.MEHVSS(+79.97)S(+79.97)EESIIS(+79.97)QETYKQEK.N	2708.04	1.9	903.688	P02663|CASA2_BOVIN	19	39	21	0	0	562000	0
E.SIIS(+79.97)QETYKQEKN.M	1646.76	1.5	824.386	P02663|CASA2_BOVIN	28	40	13	0	1420000	0	0
Q.YLYQGPIVLNPWDQVKR.N	2088.12	2.8	697.048	P02663|CASA2_BOVIN	113	129	17	0	349000	0	0
Y.LYQGPIVLNPWDQVKR.N	1925.05	0	642.691	P02663|CASA2_BOVIN	114	129	16	0	390000	0	0
N.PWDQVKRNAVPITPT.L	1720.93	1.9	861.472	P02663|CASA2_BOVIN	123	137	15	928000	0	490000	356000
N.PWDQVKR.N	927.493	0	464.754	P02663|CASA2_BOVIN	123	129	7	14600	0	0	0
R.NAVPITPT.L	811.444	1.5	812.452	P02663|CASA2_BOVIN	130	137	8	611000	0	0	581000
T.LNREQLSTS(+79.97)EEN.S	1498.63	3.2	750.325	P02663|CASA2_BOVIN	138	149	12	83200	0	52600	0
T.LNREQLS(+79.97)TS(+79.97)EEN.S	1578.6	0.5	790.306	P02663|CASA2_BOVIN	138	149	12	181000	0	262000	0
T.LNREQLS(+79.97)TSEENSK.K	1713.76	2	857.888	P02663|CASA2_BOVIN	138	151	14	41600	0	0	0
T.LNREQLS(+79.97)TS(+79.97)EENSKKTVD.M	2236.96	1.8	1119.49	P02663|CASA2_BOVIN	138	155	18	0	126000	0	0
D.MES(+79.97)TEVFTK.K	1150.46	1.9	576.239	P02663|CASA2_BOVIN	156	164	9	0	0	44100	0
D.MES(+79.97)TEVFTKK.T	1278.56	1.4	640.287	P02663|CASA2_BOVIN	156	165	10	0	0	279000	0
E.VFTKKTKLTEEEKN.R	1693.92	0.8	565.649	P02663|CASA2_BOVIN	161	174	14	0	154000	0	0
F.TKKTKLTEEEKN.R	1447.79	0.4	483.603	P02663|CASA2_BOVIN	163	174	12	0	26500	0	0
K.TKLTEEEKN.R	1090.55	2.8	546.284	P02663|CASA2_BOVIN	166	174	9	7050	0	0	0
K.LTEEEKNR.L	1017.51	3.6	509.764	P02663|CASA2_BOVIN	168	175	8	10100	0	0	0
K.TVYQHQK.A	902.461	3	452.239	P02663|CASA2_BOVIN	197	203	7	16200	0	0	0
Y.QHQKAMKPW.I	1152.59	2.3	577.302	P02663|CASA2_BOVIN	200	208	9	0	0	18800	0
K.AMKPWIQPKTKVIPYVRYL	2330.33	3.3	777.788	P02663|CASA2_BOVIN	204	222	19	1180000	0	0	253000
K.PWIQPKTKVIPYVRYL	2000.16	0.8	501.048	P02663|CASA2_BOVIN	207	222	16	0	0	166000	0
W.IQPKTKVIPYVRYL	1717.03	2.3	859.524	P02663|CASA2_BOVIN	209	222	14	0	0	11400000	0
W.IQPKTKVIPY.V	1185.71	1.1	593.864	P02663|CASA2_BOVIN	209	218	10	0	0	144000	0
K.TKVIPYVRYL	1250.74	3.4	626.379	P02663|CASA2_BOVIN	213	222	10	1440000	0	0	0
T.KVIPYVRYL	1149.69	1.7	575.854	P02663|CASA2_BOVIN	214	222	9	0	0	75300	0
Y.GLKSRSKKF.R	1049.63	3.6	525.826	P31096|OSTP_BOVIN	159	167	9	10600	0	0	0
K.AAPAGAAIQS.R	855.445	1.5	856.454	P81265|PIGR_BOVIN	576	585	10	23500	0	0	0
E.SVKDAAGGPGAPADPGRPT.G	1719.85	-0.3	860.934	P81265|PIGR_BOVIN	605	623	19	0	377000	0	0
E.SVKDAAGGPGAPADPGRPTGYSGS.S	2171.02	-1.1	1086.52	P81265|PIGR_BOVIN	605	628	24	0	441000	0	0
D.AAGGPGAPADPGRPTGYSGS.S	1741.8	1.4	871.909	P81265|PIGR_BOVIN	609	628	20	0	44300	0	0
D.AAGGPGAPADPGRPTGYSGSSKALVSTLVPLA.L	2921.52	-0.4	974.848	P81265|PIGR_BOVIN	609	640	32	0	0	68100	0
R.RHPYFYAPELLYYANK.Y	2044.02	-2.3	682.346	P02769|ALBU_BOVIN	168	183	16	0	0	0	11800
N.P(+15.99)GPAGPAGPR.G	891.456	1.1	446.736	P02465|CO1A2_BOVIN	271	280	10	0	0	0	43200
R.GAP(+15.99)GDRGEP(+15.99)GP(+15.99)PGPAG.F	1435.63	2.6	718.826	P02453|CO1A1_BOVIN	796	811	16	0	0	0	167000
N.AGPP(+15.99)GPP(+15.99)GPAGKEG.S	1219.58	2.2	610.8	P02453|CO1A1_BOVIN	891	904	14	0	0	0	57900
N.AGPP(+15.99)GP(+15.99)PGPAGKEG.S	1219.58	1.2	610.8	P02453|CO1A1_BOVIN	891	904	14	0	0	0	39500
